# Supplementary material
Source: PubMed Central journal article supplement (PMC6366661)
Supplement: NIHMS959390-supplement.pdf [file NIHMS959390-supplement.pdf]

# Supporting Information

## Catalytic selectivity of metallophthalocyanines for electrochemical nitric oxide sensing

Micah D. Brown<sup>a</sup> and Mark H. Schoenfisch<sup>a\*</sup>

<sup>a</sup> Department of Chemistry, University of North Carolina at Chapel Hill, CB 3290, Chapel Hill, NC 27599

\*To whom correspondence should be addressed: [schoenfisch@unc.edu](mailto:schoenfisch@unc.edu)

### Table of Contents

|                                                                          |       |
|--------------------------------------------------------------------------|-------|
| Figure S1: Chemical structure of metallophthalocyanines (MPc).           | p. S2 |
| Figure S2: Scheme of MPc-mediated electrocatalysis of nitric oxide (NO). | p. S2 |
| Figure S3: XPS surface analysis of MPc-modified glassy carbon.           | p. S3 |
| Figure S4: DPV voltammograms and corresponding NO calibration plots.     | p. S4 |
| Figure S5: CPA amperograms and corresponding NO calibration plots.       | p. S5 |

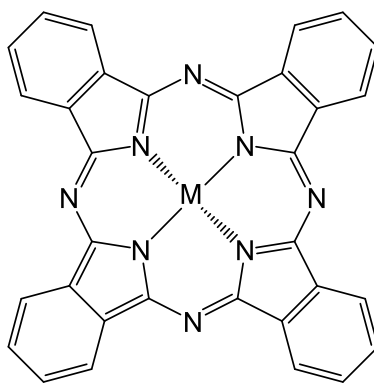

M = Fe, Co, Ni, Zn

**Figure S1.** Chemical structure of the metallophthalocyanines used in this study.

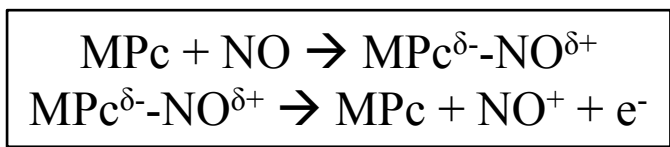

**Figure S2.** Metallophthalocyanine-mediated oxidation of nitric oxide. The symbol  $\delta^+$  indicates a partial charge transfer to the MPc complex, not necessarily localized at the metal center.

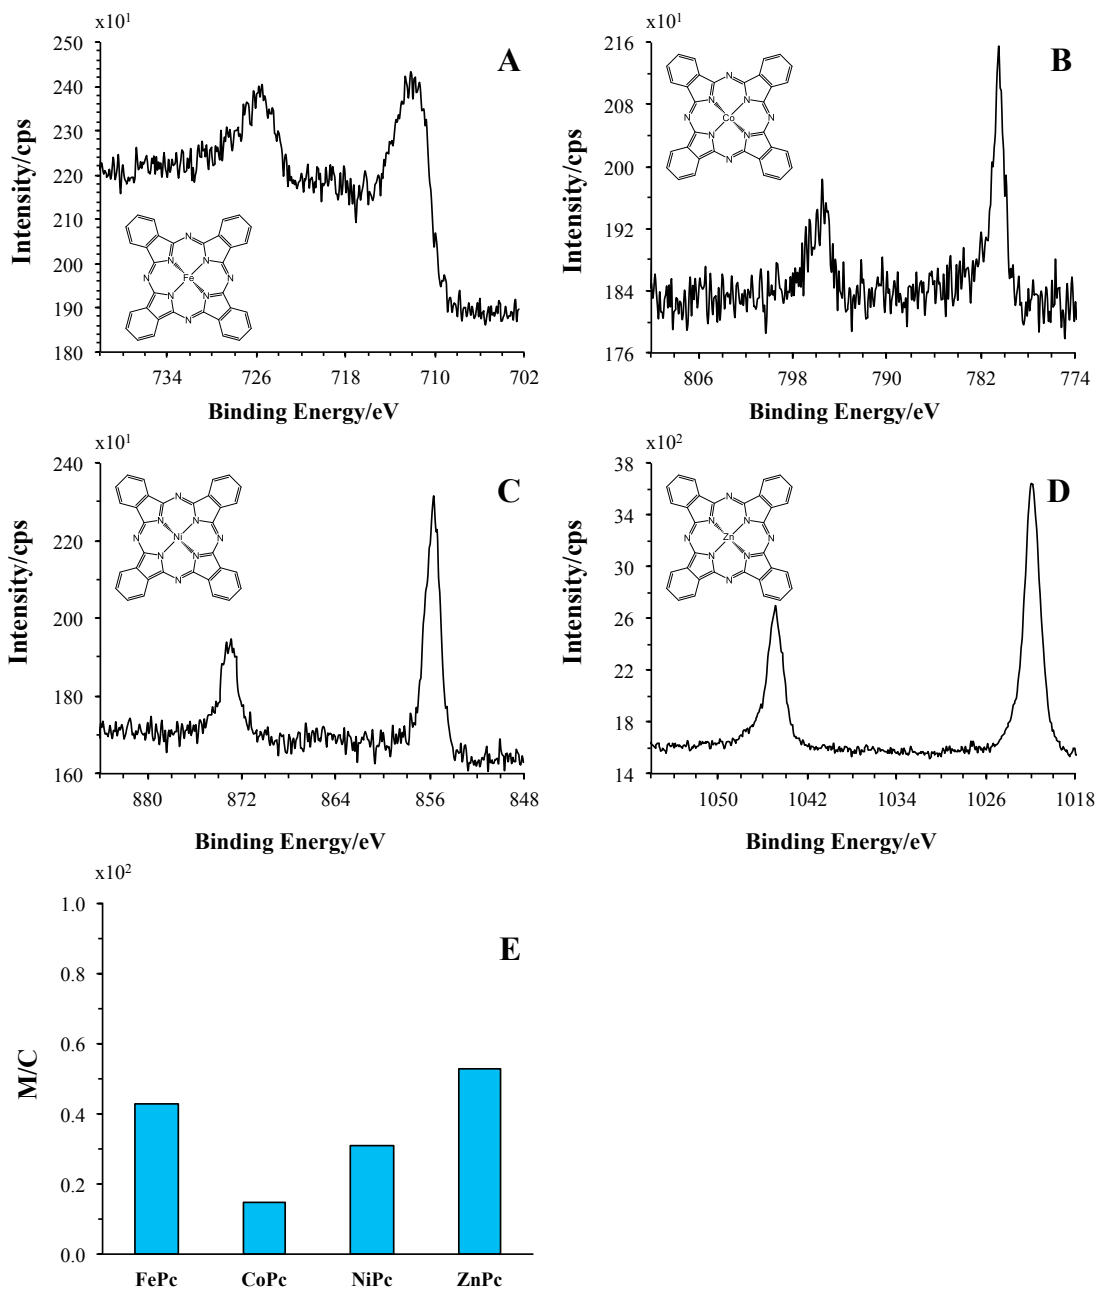

**Figure S3.** High-resolution scans of the signature 2p peaks of the transition metal centers of (A) iron-phthalocyanine (FePc), (B) cobalt-phthalocyanine (CoPc), (C) nickel-phthalocyanine (NiPc), and (D) zinc-phthalocyanine (ZnPc) deposited on glassy carbon (GC). (E) M/C atomic ratios of different MPC-modifications on GC calculated using Kratos Vision software.

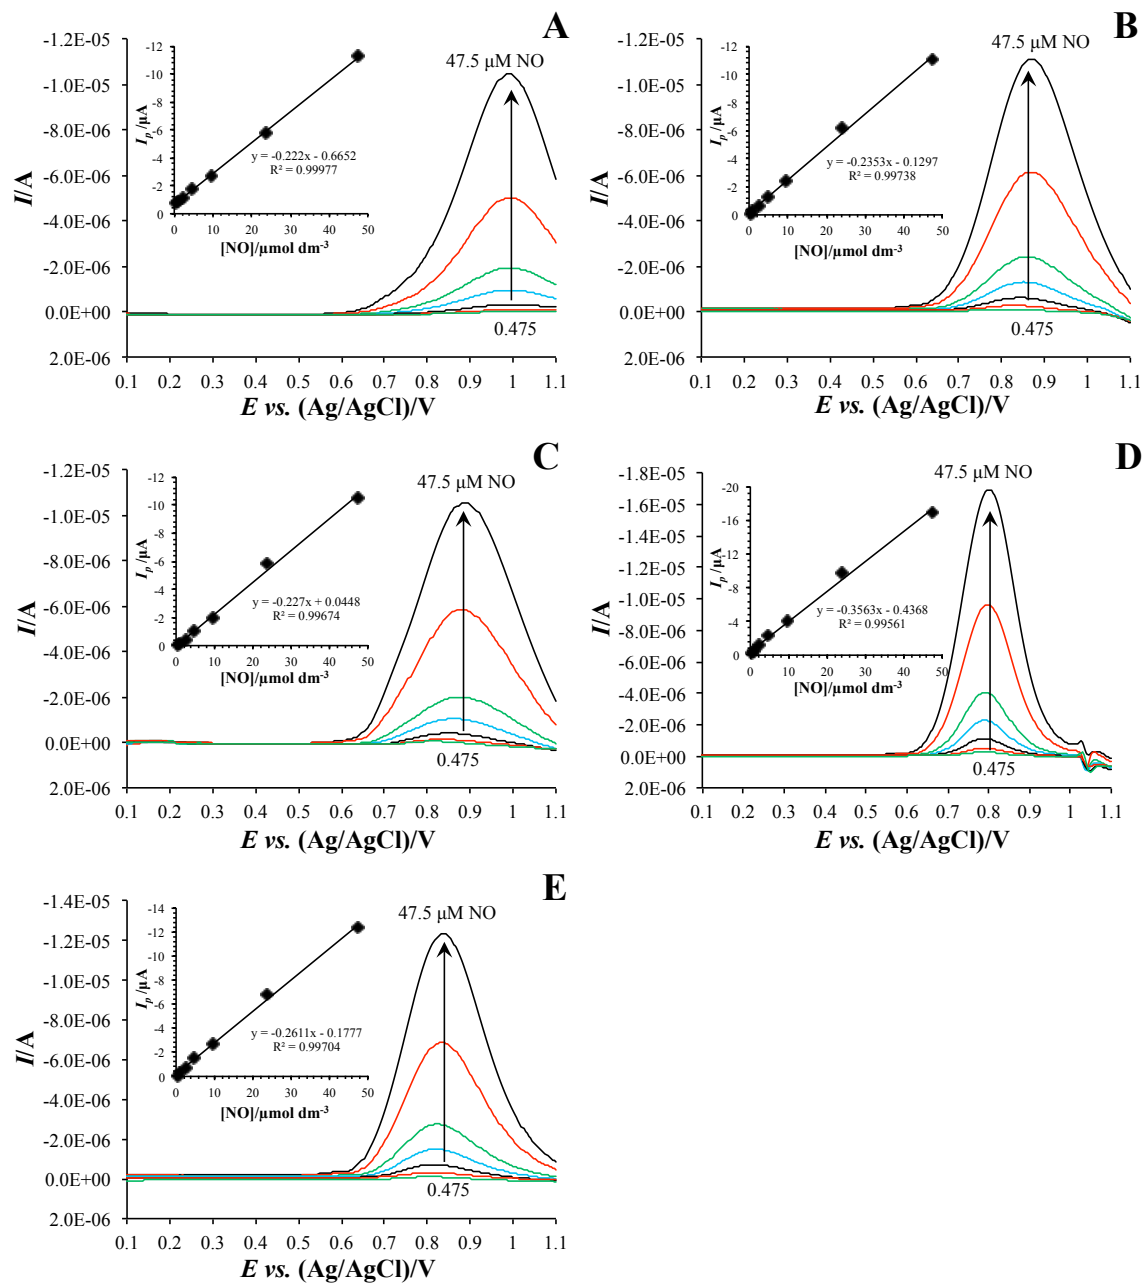

**Figure S4.** Representative overlays of the DPV traces collected in the presence of various concentrations of NO in PBS on (A) bare, (B) FePc-modified, (C) CoPc-modified, (D) NiPc-modified, and (E) ZnPc-modified GC electrodes (Insets: respective calibration curves from the peak currents as a function of NO concentration). Blank DPV scans collected over the same potential range in PBS were subtracted from all traces.

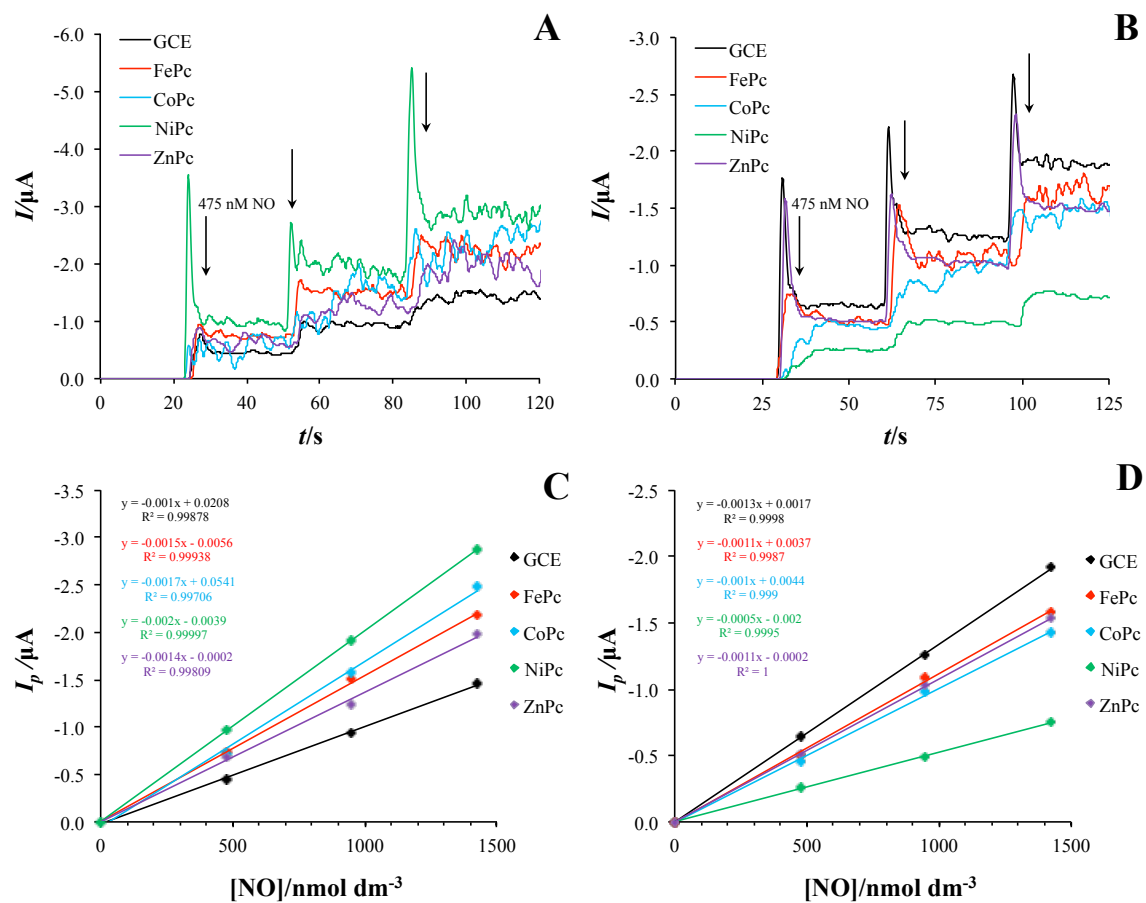

**Figure S5.** (A) Background-subtracted representative amperograms of bare and MPc-modified GC electrodes with subsequent injections of NO in PBS with an applied potential of +1022 mV and (B) an applied potential equivalent to the anodic peak potential  $E_{a,NO}$  of each sensor. (C, D) Calibration plots of the current as a function of NO concentration with respect to amperograms (A) and (B), respectively.
